# 1 Revisiting tradeoffs in Rubisco kinetic parameters

2 Avi I. Flamholz<sup>a</sup>, Noam Prywes<sup>a,b</sup>, Uri Moran<sup>b</sup>, Dan Davidi<sup>b</sup>, Yinon M. Bar-On<sup>b</sup>, Luke M.  
3 Oltrogge<sup>a</sup>, Rui Alves<sup>c,d</sup>, David Savage<sup>a</sup> and Ron Milo<sup>b</sup>

4  
5 <sup>a</sup>Department of Molecular and Cell Biology, University of California, Berkeley, CA 94720;

6 <sup>b</sup>Department of Plant and Environmental Sciences, Weizmann Institute of Science, Rehovot  
7 76100, Israel;

8 <sup>c</sup>Institute of Biomedical Research of Lleida IRBLleida, 25198, Lleida, Catalunya, Spain;

9 <sup>d</sup>Departament de Ciències Mèdiques Bàsiques, University of Lleida, 25198, Lleida, Catalunya,  
10 Spain;

11

## 12 Abstract

13 Rubisco is the most abundant enzyme in the biosphere and one of the best-characterized  
14 enzymes. Based on correlations between Rubisco kinetic parameters, it is widely posited that  
15 tradeoffs embedded in the catalytic mechanism constrain its specificity and maximum catalytic  
16 rate. However, the reasoning that established this view was based on data from  $\approx 20$  organisms.

17 We re-examine these tradeoff models using a dataset from  $\approx 300$  organisms. Most correlations  
18 are substantially attenuated, with the inverse relationship between carboxylation  $k_{\text{cat}}$  and  
19 specificity  $S_{\text{C/O}}$  being a key example. Only one tradeoff model survives in our dataset. In this  
20 model, increasing catalytic efficiency ( $k_{\text{cat}}/K_M$ ) for carboxylation requires increased catalytic  
21 efficiency for the competing oxygenation reaction, evidenced by strong power-law correlation  
22 between catalytic efficiencies. Our results imply that Rubisco evolution is constrained primarily  
23 by the physicochemical limits of  $\text{O}_2/\text{CO}_2$  discrimination, which should reframe efforts to engineer  
24 this very central enzyme.

## 25 Introduction

26 Ribulose-1,5-Bisphosphate Carboxylase/Oxygenase (Rubisco) is the primary carboxylase of the  
27 Calvin-Benson-Bassham (CBB) cycle - the carbon fixation cycle responsible for growth  
28 throughout the green lineage and many other autotrophic taxa - and the ultimate source of  
29 nearly all carbon atoms entering the biosphere (Raven, 2013). Typically, 20-30% of total soluble  
30 protein in C3 plant leaves is Rubisco (Galmés et al., 2014). As Rubisco is so highly expressed  
31 and plants are the dominant constituents of planetary biomass (Bar-On et al., 2018), it is often  
32 said that Rubisco is the most abundant enzyme on Earth (Raven, 2013). Since Rubisco is  
33 ancient ( $>2.5$  billion years old), abundant, and remains central to biology, one might expect it to  
34 be exceptionally fast. But Rubisco is not fast (Bar-Even et al., 2011; Bathellier et al., 2018; Savir  
35 et al., 2010; Shih et al., 2016; Tcherkez et al., 2006). Typical central metabolic enzymes have a

36 maximum catalytic rate  $k_{\text{cat}} \approx 80 \text{ s}^{-1}$  (Bar-Even et al., 2011), but more than 95% of Rubisco  
37 carboxylation  $k_{\text{cat}}$  values are between 1-10  $\text{s}^{-1}$ .

38  
39 In addition to relatively low carboxylation  $k_{\text{cat}}$  values, all known Rubiscos are capable of reacting  
40 “wastefully” with  $\text{O}_2$  in a process called oxygenation (Figure 1A-B). Both carboxylation and  
41 oxygenation of the Rubisco substrate ribulose 1,5-bisphosphate (RuBP) are energetically  
42 favorable, but only carboxylation is considered productive because it incorporates carbon from  
43  $\text{CO}_2$  into precursors that can generate biomass (Figure 1AB). Oxygenation is considered  
44 counterproductive as it occupies Rubisco active sites and yields a product (2-phosphoglycolate,  
45 2PG) that is not part of the CBB cycle and must be recycled through metabolically-expensive  
46 photorespiration at a partial loss of carbon (Bauwe et al., 2010; Busch et al., 2017). As such,  
47 oxygenation by Rubisco can substantially reduce the net rate of carboxylation. There are at  
48 least four distinct Rubisco isoforms in nature (Jaffe et al., 2018; Liu et al., 2017), but all known  
49 Rubiscos catalyze both carboxylation and oxygenation of RuBP through the multistep  
50 mechanism described in Figure 1A (Andersson, 2008; Cleland et al., 1998). Despite the fact that  
51 many autotrophs depend on Rubisco carboxylation for growth, all known Rubiscos are relatively  
52 slow carboxylases and fail to exclude oxygenation (Figure 1A-B).

53  
54 As a concrete example, the fastest-carboxylating Rubisco ever observed (at 25 °C) is from the  
55 freshwater cyanobacterium *S. elongatus* PCC 7942 (Occhialini et al., 2016). The PCC 7942  
56 Rubisco has a maximum per-active site carboxylation rate ( $k_{\text{cat,C}}$ ) of 14.4  $\text{s}^{-1}$ . However, because  
57 present day atmosphere contains abundant  $\text{O}_2$  and relatively little  $\text{CO}_2$  ( $\approx 21\% \text{ O}_2$ ,  $\approx 0.04\% \text{ CO}_2$ ),  
58 this Rubisco carboxylates at a rate 20-fold below maximum in ambient conditions ( $\approx 0.7 \text{ s}^{-1}$  per  
59 active site, rate law in Figure 1A). Due to its relatively low specificity towards  $\text{CO}_2$ , PCC 7942  
60 Rubisco will also oxygenate RuBP in ambient conditions at a rate ( $\approx 0.3 \text{ s}^{-1}$ ) that is about half the  
61 carboxylation rate, which would necessitate substantial photorespiratory flux to recycle 2PG. As  
62 downstream processing of 2PG by the canonical  $\text{C}_2$  photorespiratory pathway leads to the loss  
63 of one carbon for every two 2PG (Bauwe et al., 2010; Busch et al., 2017), every two  
64 oxygenations “undoes” a carboxylation. As such, the net rate of carboxylation by PCC 7942  
65 Rubisco is roughly  $R_{\text{C}} - R_{\text{O}}/2 \approx 0.7 - 0.15 = 0.55$  carboxylations per second, more than 25 times  
66 less than  $k_{\text{cat,C}}$ . Indeed, all known cyanobacteria use a  $\text{CO}_2$ -concentrating mechanism (CCM) to  
67 ensure that Rubisco functions in a  $\text{CO}_2$ -rich environment. High  $\text{CO}_2$  ensures that oxygenation is  
68 inhibited and that carboxylation proceeds at near-maximum rate (Mangan et al., 2016; Reinhold  
69 et al., 1991). Just tenfold enrichment of  $\text{CO}_2$  above ambient would increase the carboxylation  
70 rate of PCC 7942 Rubisco to  $\approx 5 \text{ s}^{-1}$  and suppress oxygenation to  $\approx 0.2 \text{ s}^{-1}$  per active site, giving  
71 a net carboxylation rate of  $\approx 4.6 \text{ s}^{-1}$  per active site.

72  
73 For comparison, the well-studied Rubisco from spinach leaves (*S. oleracea*) carboxylates much  
74 more slowly ( $k_{\text{cat,C}} \approx 3 \text{ s}^{-1}$ ) but also has much greater affinity towards  $\text{CO}_2$  than the *S. elongatus*  
75 enzyme (half-maximum  $\text{CO}_2$  concentration  $K_{\text{C}} \approx 12 \text{ }\mu\text{M}$  for spinach as compared to  $K_{\text{C}} \approx 170 \text{ }\mu\text{M}$

76 for *S. elongatus* PCC 7942). As a result, the spinach enzyme outperforms the cyanobacterial  
77 enzyme in present day atmosphere, achieving a carboxylation rate of  $\approx 1.2 \text{ s}^{-1}$  and an  
78 oxygenation rate of  $\approx 0.4 \text{ s}^{-1}$ . This represents a net carboxylation rate of  $\approx 1 \text{ s}^{-1}$ , nearly double  
79 that of the cyanobacterial example above. Spinach is a C3 plant, meaning it does not have a  
80  $\text{CO}_2$  concentrating mechanism, which likely explains why it evolved to use a slow-but-specific  
81 enzyme for catalysis in ambient conditions. Still, many other enzymes catalyze far more than  
82 1.2 reaction per second (Bar-Even et al., 2011), which leads many to wonder if Rubisco  
83 catalysis could be improved by engineering. Improved Rubisco carboxylation is expected to  
84 increase C3 crop yields (Zhu et al., 2010), but a substantially improved enzyme has evaded  
85 bioengineers for decades (Spreitzer and Salvucci, 2002). The repeated evolution of diverse  
86 CCMs, which modulate the catalytic environment rather than the enzyme itself, raises further  
87 doubts about whether Rubisco catalysis can be strictly improved (Raven et al., 2017).

88  
89 Various nomenclature has been used to describe the kinetics of Rubisco carboxylation and  
90 oxygenation (Pierce et al., 1986; Savir et al., 2010; Tcherkez et al., 2006) since its discovery in  
91 the 1950s (Wildman, 2002). Here we use  $k_{\text{cat,C}}$  and  $k_{\text{cat,O}}$  to denote turnover numbers (maximum  
92 per active site catalytic rates in units of  $\text{s}^{-1}$ ) for carboxylation and oxygenation respectively.  $K_C$   
93 and  $K_O$  denote the Michaelis constants (half-saturation concentrations in  $\mu\text{M}$  units) for  
94 carboxylation and oxygenation. The specificity factor  $S_{\text{C/O}} = (k_{\text{cat,C}}/K_C) / (k_{\text{cat,O}}/K_O)$  is a unitless  
95 measure of the relative preference for  $\text{CO}_2$  over  $\text{O}_2$  (Figure 1A-C). Since  $S_{\text{C/O}}$  relates only to the  
96 ratio of kinetic parameters, it should be noted that higher  $S_{\text{C/O}}$  does not necessarily imply higher  
97 carboxylation rates. Rather, absolute carboxylation and oxygenation rates depend on the  $\text{CO}_2$   
98 and  $\text{O}_2$  concentrations which can vary between organisms.

99  
100 As data on bacterial, archaeal and plant rubiscos has accumulated over the decades, many  
101 researchers have noted that fast-carboxylating Rubiscos are typically less  $\text{CO}_2$ -specific  
102 (Bainbridge et al., 1995; Jordan and Ogren, 1981; Parry et al., 1989). In other words, Rubiscos  
103 with high  $k_{\text{cat,C}}$  were observed to have lower  $S_{\text{C/O}}$  due either to lower  $\text{CO}_2$ -affinity (high  $K_C$ ) or  
104 higher catalytic efficiency towards  $\text{O}_2$  ( $k_{\text{cat,O}}/K_O$ ). This negative correlation between  $k_{\text{cat,C}}$  and  $S_{\text{C/O}}$   
105 is often cited to motivate the idea that the Rubisco mechanism imposes a tradeoff between  
106 carboxylation rate and specificity that constrains the evolution of this enzyme (Bainbridge et al.,  
107 1995; Savir et al., 2010; Shih et al., 2016; Tcherkez et al., 2006). Indeed, if the Rubisco  
108 mechanism imposes a tradeoff between  $k_{\text{cat,C}}$  and  $S_{\text{C/O}}$  we would expect strong correlation  
109 between those parameters because Rubisco is so central to autotrophic life and has, therefore,  
110 likely experienced strong selection pressure. As diagrammed in Figure 1C, strong selection for  
111 Rubisco carboxylation could in theory push the enzyme towards a point where its kinetics can  
112 be improved no further. Since different kinetics are preferable in different  $\text{CO}_2$  and  $\text{O}_2$   
113 concentrations (as described above) strong selection is claimed to produce a situation in which  
114 the kinetics of natural enzymes trace out a curve determined by the underlying tradeoff (Savir et  
115 al., 2010; Shoval et al., 2012; Tcherkez et al., 2006).

116  
117 Two distinct tradeoff models have been proposed to explain the observed correlations between  
118 Rubisco kinetic parameters (Savir et al., 2010; Tcherkez et al., 2006). Although the proposed

119 models are substantively different, both models imply limitations on the concurrent improvement  
 120 of the maximum carboxylation rate ( $k_{cat,C}$ ) and specificity ( $S_{C/O}$ ) of natural Rubiscos. While these  
 121 hypotheses appeal to physical and chemical intuition, they are based on data from only  $\approx 20$   
 122 organisms. Here we take advantage of the accumulation of new data - more than 200 Rubisco  
 123 variants have been characterized since 2010 - to examine whether new data evidence the same  
 124 correlations. We find that most previously-reported correlations between Rubisco kinetic  
 125 parameters are substantially attenuated by the addition of new data, with the negative  
 126 correlation between  $k_{cat,C}$  and specificity  $S_{C/O}$  being a key example.

127  
 128 Only one previously-reported correlation remains both strong and statistically significant in the  
 129 extended dataset - a power-law correlation between the catalytic efficiency for carboxylation  
 130 ( $k_{cat,C}/K_C$ ) and the catalytic efficiency for oxygenation ( $k_{cat,O}/K_O$ ) first reported in (Savir et al.,  
 131 2010). We propose a simple physico-chemical model based on the Rubisco mechanism that  
 132 can explain this very strong correlation. In this model, variation in catalytic efficiency ( $k_{cat,C}/K_C$   
 133 and  $k_{cat,O}/K_O$ ) derives solely from gating substrate access to the active site complex, which could  
 134 help explain why Rubisco has been so recalcitrant to improvement by mutagenesis and rational  
 135 engineering.

136

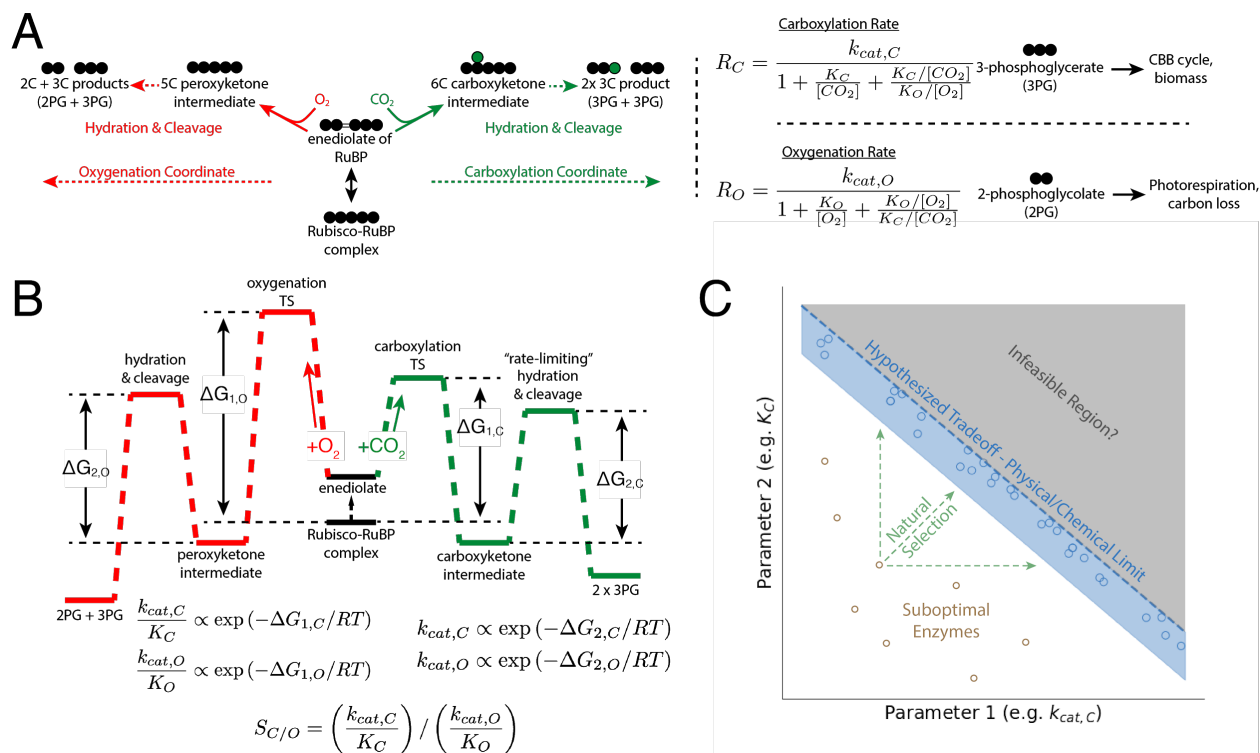

137  
 138 **Figure 1:** Description of the catalytic mechanism of Rubisco. The “middle-out” diagram in Panel A shows  
 139 the ordered mechanisms of carboxylation and oxygenation. Circles represent carbon atoms. RuBP is first  
 140 isomerized to an enediolate before carboxylation or oxygenation can occur. Addition of  $CO_2$  or  $O_2$  to the  
 141 enediolate of RuBP are considered irreversible as are the subsequent hydration and cleavage steps of  
 142 carboxylation and oxygenation arms. Carboxylation displays effective Michaelis-Menten kinetics

143 (maximum catalytic rate  $k_{cat,C}$ , half-maximum  $CO_2$  concentration  $K_M = K_C$ ) with competitive inhibition by  $O_2$   
144 (assuming half-maximum inhibitory  $O_2$  concentration  $K_i = K_O$ ). Carboxylation results in net addition of one  
145 carbon to the five-carbon RuBP, which produces two 3PG molecules. 3PG is part of the CBB cycle and  
146 can therefore be used to continue the cycle and produce biomass. Oxygenation also displays effective  
147 Michaelis-Menten kinetics ( $k_{cat,O}$ ,  $K_M = K_O$ , half-max inhibitory  $CO_2$  concentration  $K_i = K_C$ ). Oxygenation of  
148 RuBP produces one 3PG and one 2PG. 2PG is not part of the CBB cycle and must be recycled through  
149 photorespiration to avoid the loss of both carbons in 2PG to central metabolism. Per-active site rates of  
150 carboxylation ( $R_C$ ) and oxygenation ( $R_O$ ) can be calculated from kinetic parameters and the  $CO_2$  and  $O_2$   
151 concentrations. The reaction coordinate diagram in panel (B) mirrors panel A and describes Rubisco  
152 carboxylation and oxygenation as a function of two “effective” barriers as in (Savir et al., 2010). The first  
153 effective barrier describes enolization and gas addition while the second describes hydration and bond  
154 cleavage. Given standard assumptions (described in SI), the respective catalytic efficiencies ( $k_{cat}/K_M$ ) are  
155 related to the height of the first effective barrier while the  $k_{cat}$ s are related to the second. The first barrier  
156 to oxygenation is drawn higher than for carboxylation because Rubisco oxygenation is typically much  
157 slower than carboxylation. The net reactions of RuBP carboxylation and oxygenation are both quite  
158 thermodynamically favorable ( $\Delta_r G^m \approx -28$  kJ/mol and  $-520$  kJ/mol respectively (Flamholz et al., 2012)). As  
159 kinetic parameters are linearly related to the log of effective energy barriers, energetic tradeoffs should  
160 manifest as linear correlations in a log-log plot of kinetic parameters (C). As Rubisco is central to  
161 photoautotrophic growth, we expect that natural selection has pushed the enzyme towards the upper  
162 limits of its catalytic capacity - i.e. towards the blue shaded region.

## 163 Results

### 164 An extended dataset of Rubisco kinetic parameters

165 To augment existing data, we collected literature data on  $\approx 300$  Rubiscos including  
166 representatives of clades and physiologies that had been poorly represented in earlier datasets  
167 e.g. diatoms, ferns, CAM plants and anaerobic bacteria (Figure 2A). We collected kinetic  
168 parameters associated with carboxylation and oxygenation -  $S$ ,  $K_C$ ,  $k_{cat,C}$ ,  $K_O$  and  $k_{cat,O}$  - as well  
169 as measurements of the RuBP Michaelis constant (half-maximum RuBP concentration,  $K_{RuBP}$ )  
170 and experimental uncertainty for all values where available. All data considered were measured  
171 at 25 °C and near pH 8 to ensure that measured values are comparable (Methods).

172  
173 The resulting dataset contains Rubisco kinetic parameters from a total of 286 distinct species  
174 including 319  $S_{C/O}$  values, 275  $k_{cat,C}$  values, 310  $K_C$  values, 198  $k_{cat,O}$  values and 256  $K_O$  values  
175 (Figure 2B). The Michaelis constant for RuBP is not measured frequently and so only 45 values  
176 were extracted. In 198 cases there was sufficient data to calculate catalytic efficiencies for  
177 carboxylation ( $k_{cat,C}/K_C$ ) and oxygenation ( $k_{cat,O}/K_O$ , Methods). Though the data include  
178 measurements of some Form II, III and II/III Rubiscos, they remain highly focused on the Form I  
179 Rubiscos found in cyanobacteria, diatoms, algae and higher plants, which make up  $> 95\%$  of  
180 the dataset (Figure 2B). As such, we focus here on the kinetic parameters of Form I Rubiscos.

181  
182 Rubisco kinetic parameters display very narrow dynamic range, with geometric standard  
183 deviations being well-below one order-of-magnitude for all parameters (Figure 2C). The  
184 geometric standard deviation, denoted  $\sigma^*$ , expresses multiplicative variability in the dataset.

185 Rubisco displays extremely low variation in  $k_{cat,C}$  ( $\sigma^* = 1.5$ ), especially in comparison to other  
186 enzymes for which  $> 20$   $k_{cat}$  measurements are available (Figure S4). The median  $\sigma^*$  for these  
187 other enzymes is 6.9, more than fourfold higher than for Rubisco. Specificity  $S_{C/O}$  displays the  
188 least variation ( $\sigma^* = 1.3$ ) of all parameters, though this may be due in part to overrepresentation  
189 of C3 plants in the dataset, which occupy a narrow range of  $S_{C/O} \approx 80-120$ . Nonetheless,  
190 measurements of  $S_{C/O}$  for Form I and Form II enzymes are clearly distinct in this dataset, with  
191 values ranging from and 7-15 for Form IIs and roughly 50-200 for Form Is (Figure 2C, SI).

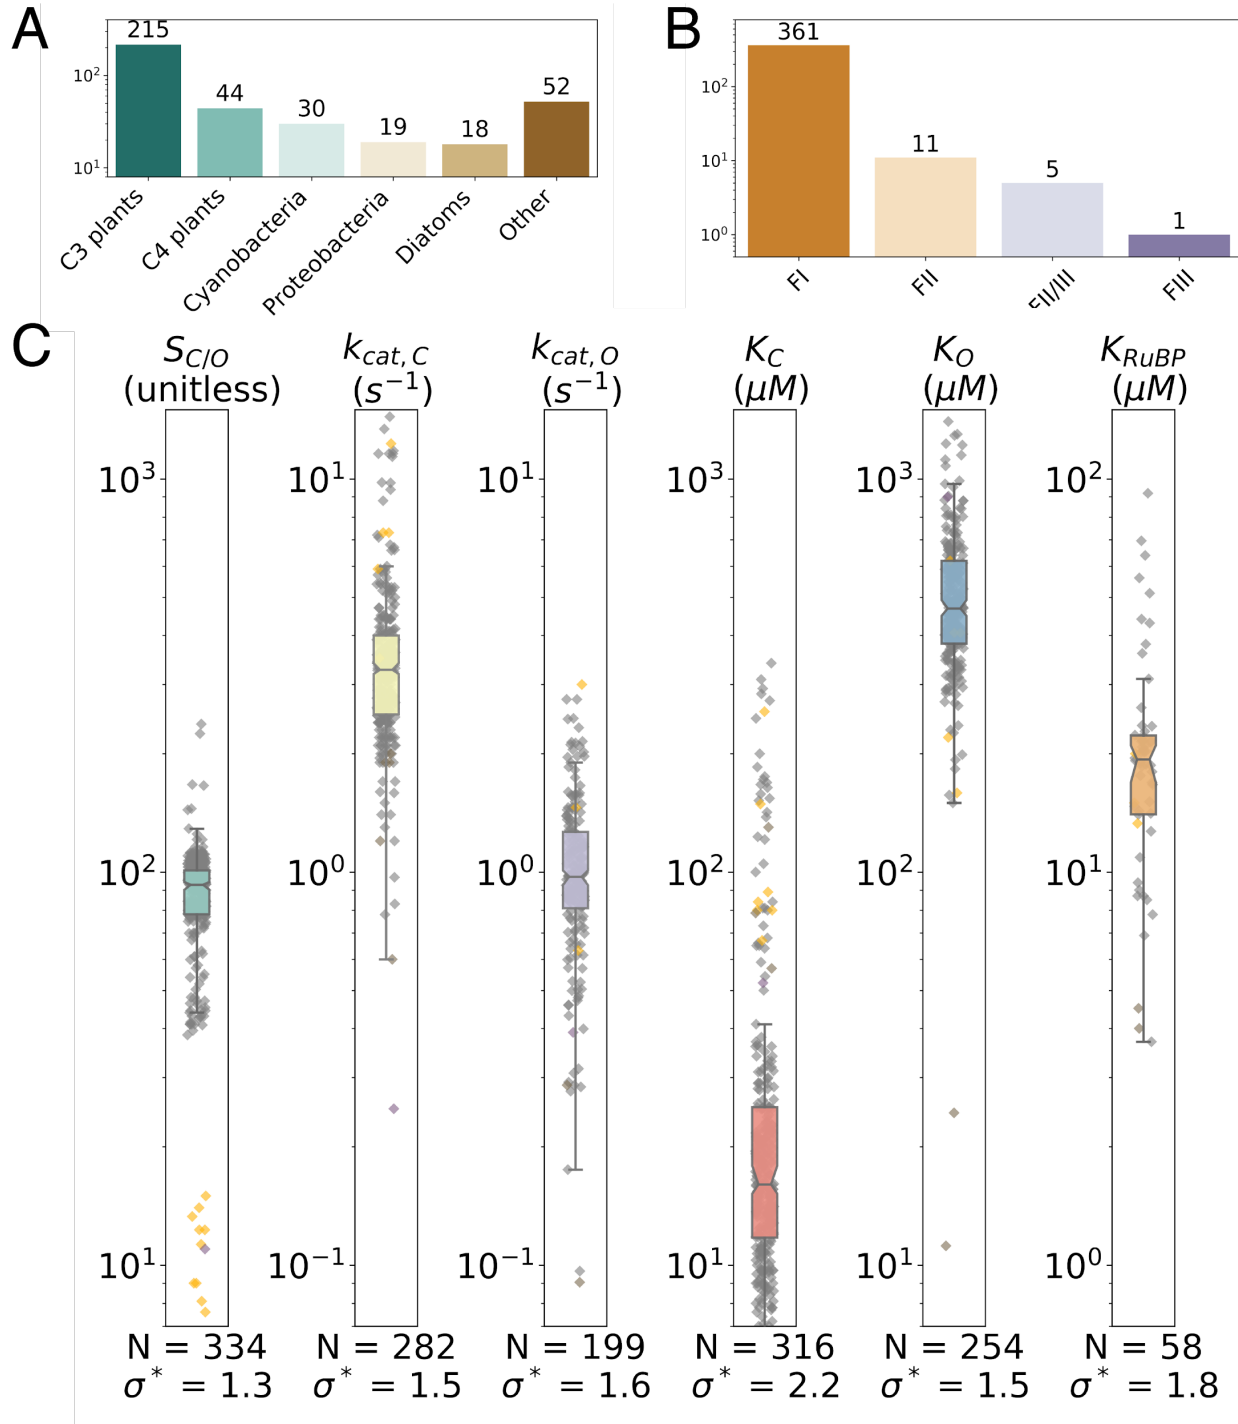

192  
193  
194  
195  
196  
197  
198  
199  
200

**Figure 2:** Summary of the full extended dataset. We collected measurements of Rubisco kinetic parameters from a variety of organisms (A) representing four classes of Rubisco isoforms (B). The bulk of data represent Form I enzymes from green lineage organisms (A-B). As shown in panel C, the assembled kinetic parameters display narrow dynamic range. The box-plot and grey points describe the distribution of Form I Rubiscos while Form II Rubiscos are in yellow. Whiskers show the range of parameter values among Form 1 enzymes, the colored box gives the range of the central 50% of Form I values and the notch indicates the median. N is the number values and the geometric standard deviation of Form I data is reported as  $\sigma^*$ .  $\sigma^* < 3$  for all parameters, meaning that a single standard deviation varies over less than

201 *threefold. All data presented in this figure are from wild-type Rubiscos measured at 25 °C near pH 8.*  
202 *More detailed histograms are given in Figure S3.*

## 203 Energetic Tradeoffs Tend to Produce Power-Law Correlations

204 All measured kinetic parameters ( $S_{C/O}$ ,  $k_{cat,C}$ ,  $K_C$ ,  $k_{cat,O}$  and  $K_O$ ) are by definition mathematically  
205 related to the microscopic rate constants of the Rubisco mechanism (SI). Given common  
206 assumptions about irreversible and rate limiting steps (elaborated below and in the SI), this  
207 multi-step mechanism can be simplified so that logarithms of measured kinetic parameters are  
208 proportional to effective transition state (TS) barriers (Figure 1B, SI). As such, tradeoffs between  
209 kinetic parameters are expected to emerge if effective TS barriers are constrained to vary  
210 together (Figure 1C). If, for example, lowering the effective TS barrier to CO<sub>2</sub> addition ( $\Delta G_{1,C}$ )  
211 requires an increase to the effective barrier to the subsequent hydration and cleavage steps of  
212 carboxylation ( $\Delta G_{2,C}$ ), then we should observe a negative linear correlation between these  
213 barrier heights such that  $\Delta G_{1,C} \propto -\Delta G_{2,C}$ . Since, as shown in Figure 1B,  $k_{cat,C}/K_C$  is related to  
214 the first effective carboxylation barrier ( $\ln(k_{cat,C}/K_C) \propto -\Delta G_{1,C}$ ) and  $k_{cat,C}$  to the second ( $\ln(k_{cat,C}) \propto -$   
215  $\Delta G_{2,C}$ ), linear correlation between transition state barrier energies should translate into log-scale  
216 correlation between kinetic parameters such that  $\ln(k_{cat,C}/K_C) \propto -\ln(k_{cat,C})$ . These log-linear  
217 relationships are known as power laws and motivate us and others to investigate the kinetic  
218 parameters on a log-log scale.

219  
220 We expect to observe strong power-law correlations between pairs of kinetic parameters when  
221 three conditions are met: (I) the associated energy barriers are subject to a tradeoff that forces  
222 them to vary together; (II) these constraints affect the net rate of carboxylation by Rubisco; and  
223 (III) the selection pressure imposed during Rubisco evolution was sufficient to reach the limits  
224 imposed by the tradeoff (as diagrammed in Figure 1C). As Rubisco is the central enzyme of  
225 photoautotrophic growth, we assume here that it evolved under selection pressure towards  
226 maximizing the net rate of carboxylation in each host (Savir et al., 2010). Notably, different host  
227 physiologies and growth environments can affect the catalytic environment Rubisco experiences  
228 - Rubiscos in different organisms experience different temperature, pH and prevailing CO<sub>2</sub> and  
229 O<sub>2</sub> concentrations (e.g. due to an anaerobic host or a CCM enriching CO<sub>2</sub>), which we expect to  
230 select for different combinations of kinetic parameters (Figure 1C).

## 231 Correlations between kinetic parameters of Form I Rubiscos

232 As in (Savir et al., 2010; Tcherkez et al., 2006) we performed a correlation analysis to  
233 investigate relationships between Rubisco kinetic parameters. Pairwise correlations between  
234 log-transformed Form I Rubisco kinetic parameters are given in Figure 3 (linear scale  
235 correlations are reported in Figure S8).

236  
237 Correlations between  $k_{cat,C}$  and  $S_{C/O}$  as well as  $k_{cat,C}$  and  $K_C$  were previously highlighted to  
238 support particular mechanistic tradeoff models (Savir et al., 2010; Tcherkez et al., 2006). In  
239 previous analyses these pairs correlated very strongly, with Pearson correlation coefficients  $R \approx$



240 0.9 for both. However, both correlations are substantially attenuated by the addition of new data  
241 ( $R \approx 0.6$ , Figure 3). Figure 4 inspects these two correlations in greater detail. Figure 4A plots  
242  $k_{\text{cat,C}}$  against  $S_{\text{C/O}}$  and shows that these parameters are only modestly correlated in the  
243 extended dataset, with  $R \approx 0.6$  (and extremely sensitive to outliers) as compared to  $R \approx 0.9$  in  
244 previous analyses (Savir et al., 2010; Tcherkez et al., 2006). Similarly, Figure 4B plots  $k_{\text{cat,C}}$   
245 against  $K_{\text{C}}$  and shows that this correlation is also weakened, with  $R \approx 0.5$  as compared to  $R \approx$   
246  $0.9$  in previous work (Savir et al., 2010). We interpret the weakened correlations detailed in  
247 Figures 3-4 as evidence that previously proposed tradeoffs may need to be experimentally  
248 revisited. Examining Figure 3 shows that only one pair of parameters,  $k_{\text{cat,C}}/K_{\text{C}}$  and  $k_{\text{cat,O}}/K_{\text{O}}$ ,  
249 correlate with  $R > 0.7$  on a log scale. This correlation between catalytic efficiencies for  
250 carboxylation and oxygenation is the strongest observed by far ( $R = 0.93$ ,  $P < 10^{-10}$ , Figure 3).  
251 We discuss possible explanations for this very strong correlation in detail below.

252  
253 One might wonder why so many pairs of Rubisco kinetic parameters correlate with appreciable  
254  $R$  values (e.g.  $R > 0.3$  for 11 of 28 pairs in Figure 3). We note that some level of correlation is  
255 expected because the measured parameters are mathematically interrelated through the  
256 microscopic mechanism of Rubisco as it is commonly understood. For example, when we derive  
257 expressions for  $k_{\text{cat,C}}$  and  $K_{\text{C}}$  from the Rubisco mechanism, they share common factors that  
258 should produce some level of correlation even in the absence of any tradeoff (SI). Similarly,  $S_{\text{C/O}}$   
259 is defined as  $(k_{\text{cat,C}}/K_{\text{C}}) / (k_{\text{cat,O}}/K_{\text{O}})$  and might correlate positively with  $k_{\text{cat,C}}$  for this reason.  
260 Because modest correlation is expected, we focus here only on very strong correlations since  
261 these may yield insight into mechanistic constraints on Rubisco evolution.

262  
263 Principal components analysis (PCA) of Rubisco kinetic parameters was previously used to  
264 interrogate constraints on Rubisco evolution. It was argued that Rubisco adaptation is  
265 constrained to a one-dimensional landscape because the first principal component (PC1)  
266 explained  $> 90\%$  of the variance in Rubisco kinetics. In a one-dimensional landscape model all  
267 kinetic parameters are tightly interrelated so that changing one (e.g.  $k_{\text{cat,C}}$ ) forces all others to  
268 assume predetermined values (Savir et al., 2010). However, our extended dataset is not well-  
269 approximated as one-dimensional. While the orientation of PC1 is not substantially altered by  
270 the addition of tenfold more measurements, it now explains  $\approx 70\%$  instead of  $>90\%$  of the  
271 variance in Rubisco kinetics (Savir et al., 2010). Three principal components are required to  
272 explain  $>90\%$  of the variation in our extended dataset (SI), consistent with the overall reduction  
273 in pairwise correlation documented in Figure 3. We therefore proceed to ask whether the  
274 correlations predicted by specific tradeoff models advanced in (Savir et al., 2010; Tcherkez et  
275 al., 2006) are supported by the extended dataset.

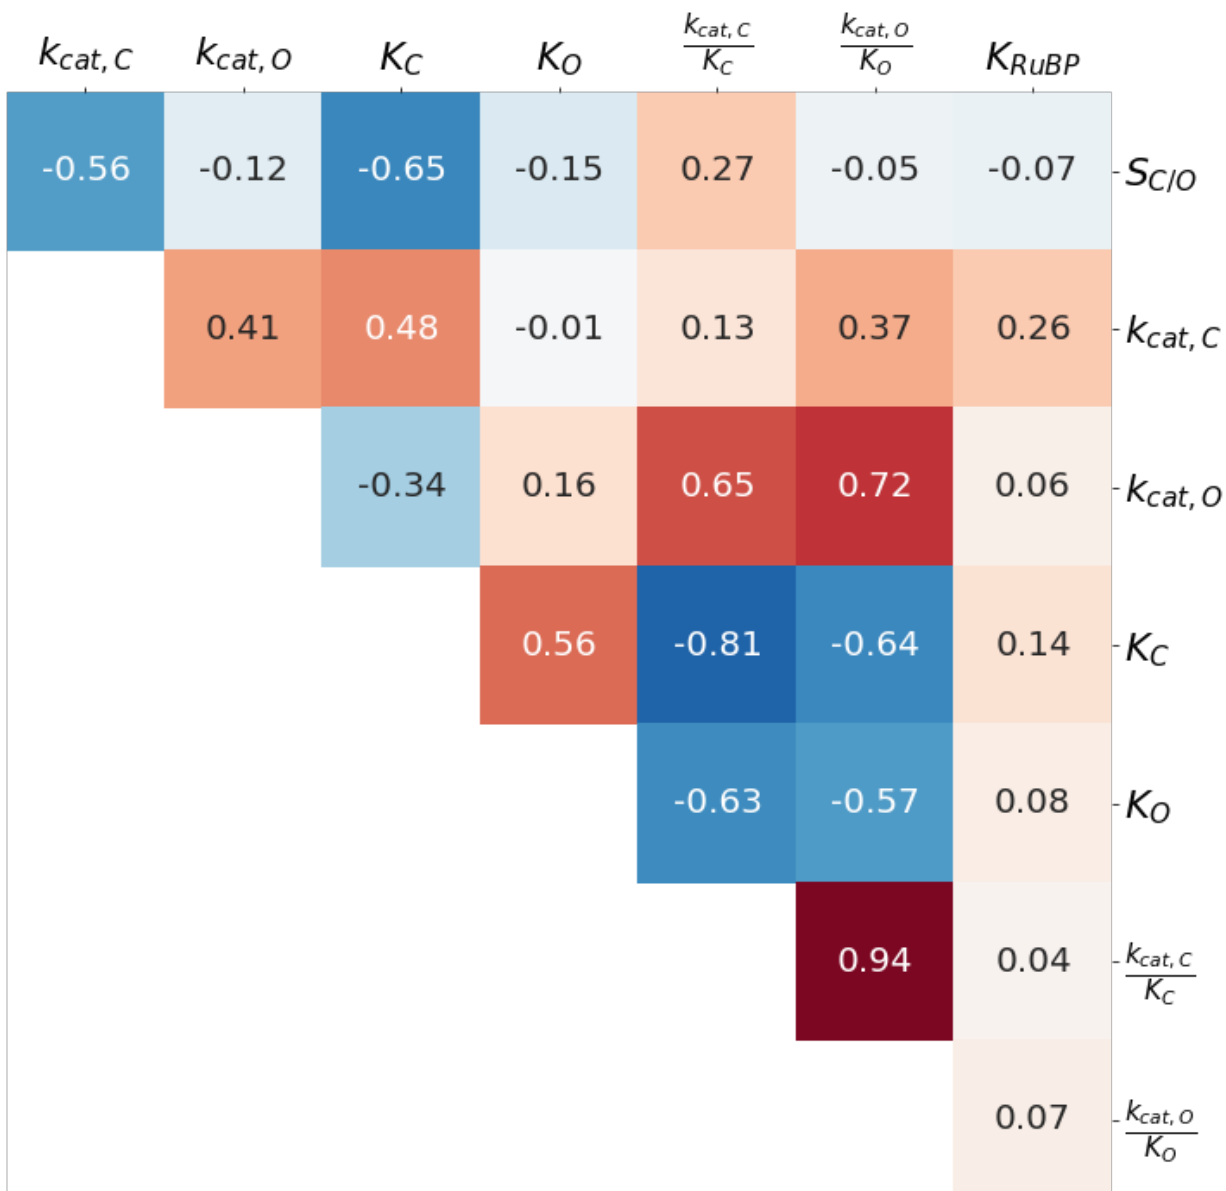

276  
 277 **Figure 3:** Correlations between kinetic parameters are mostly attenuated by addition of new data. The  
 278 figure summarizes Pearson correlations ( $R$ ) between pairs of log-transformed Form I Rubisco kinetic  
 279 parameters. When multiple measurements of the same Rubisco were available, the median value was  
 280 used (Methods). The  $S_{C/O}$ - $K_C$ ,  $S_{C/O}$ - $k_{cat,C}$ , and  $K_C$ - $k_{cat,C}$  correlations are of particular interest because they  
 281 were highlighted in previous works. None of these pairs give  $R > 0.7$ . The strongest observed correlation  
 282 is between the catalytic efficiencies for carboxylation and oxygenation,  $k_{cat,O}/K_C$  and  $k_{cat,O}/K_O$  ( $R = 0.94$ ).

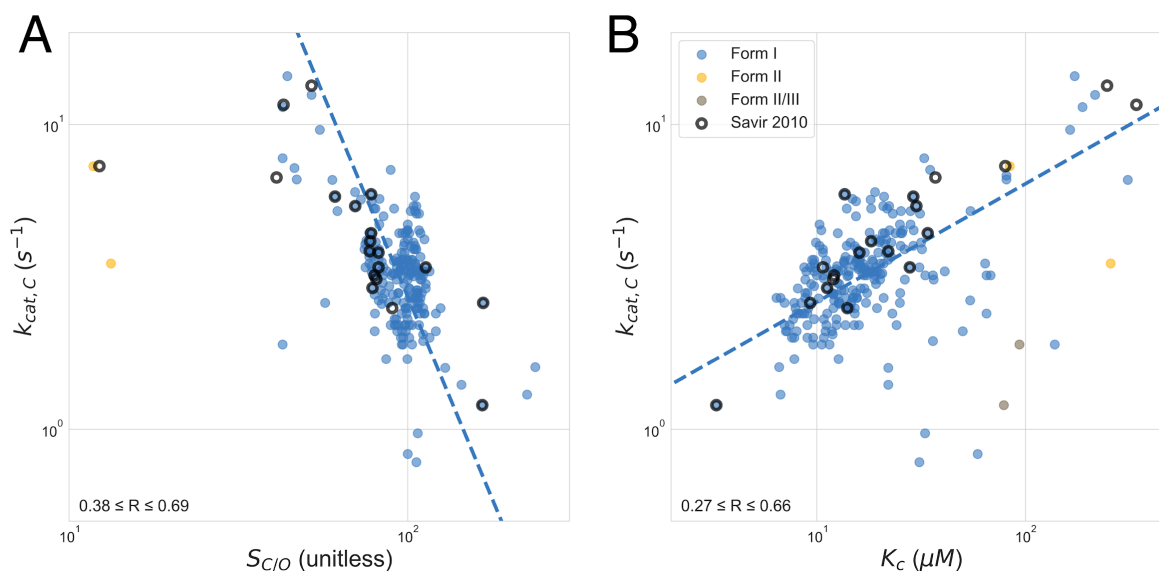

283  
 284 **Figure 4:** Focal correlations of previous analyses are not robust to new data. Points with black outlines  
 285 are those in Savir et al. 2010 and dashed blue lines represent the best fit to all Form I Rubiscos in the  
 286 extended dataset. Panel A plots the maximum carboxylation rate  $k_{cat,C}$  against specificity  $S_{C/O}$  as in  
 287 (Tcherkez et al., 2006). Considering only Form I Rubiscos,  $k_{cat,C}$  and  $S_{C/O}$  correlate with  $R \approx -0.6$ .  
 288 Bootstrapping gives very wide 95% confidence intervals (CIs) of (-4.0, -2.0) for the fit exponent and  
 289 ( $3 \times 10^4$ ,  $3 \times 10^8$ ) for the exponential prefactor (the slope and intercept in log-log scale respectively)  
 290 indicating that the form of  $k_{cat,C}$ - $S_{C/O}$  correlation is very uncertain. Panel B plots  $k_{cat,C}$  against the Michaelis  
 291 constant for  $CO_2$  ( $K_C$ ) as in (Savir et al., 2010; Tcherkez et al., 2006).  $R \approx 0.5$  as compared to the  
 292 previously reported value of 0.92. This fit is substantially more robust to outliers with bootstrapping giving  
 293 95% CIs of (0.3, 0.5) and (0.8, 1.5) for the fit exponent and prefactor respectively. More detailed plots  
 294 are given in Figure S5.

## 295 Re-evaluation of Proposed Tradeoff Models

296 Two distinct mechanistic tradeoff models were advanced in (Savir et al., 2010; Tcherkez et al.,  
 297 2006). Savir et al. 2010 cast these proposals in energetic terms by relating the measured  
 298 catalytic parameters to effective transition state barrier heights (Figure 1B, SI). The first tradeoff  
 299 model posits that that increased specificity towards  $CO_2$  necessitates a slower maximum  
 300 carboxylation rate,  $k_{cat,C}$  (Savir et al., 2010; Tcherkez et al., 2006). Tcherkez et al. 2006 propose  
 301 that this tradeoff is caused by stabilization of the first carboxylation transition state. In this model  
 302 a stable Rubisco-TS complex produces high  $CO_2$ -specificity but slows the subsequent  
 303 carboxylation steps and limits  $k_{cat,C}$  (Figure S2). This model can be construed in energetic terms  
 304 as follows: lowering the effective barrier to  $CO_2$  addition ( $\Delta G_{1,C}$  in Figure 5A) will make Rubisco  
 305 more  $CO_2$ -specific even if none of the oxygenation parameters change. The tradeoff model  
 306 posits a negative coupling between  $CO_2$  addition and the subsequent carboxylation steps of  
 307 hydration and bond cleavage (effective barrier height  $\Delta G_{2,C}$  diagrammed in Figure 5A).

308 Therefore, the energetic interpretation of the first model predicts a negative correlation between  
 309  $\Delta G_{1,C}$  and  $\Delta G_{2,C}$  and, as a result, a negative power-law correlation between  $k_{cat,C}$  and  $k_{cat,C}/K_C$ .

310  
 311 The energetic interpretation of this model was previously supported by an inverse power-law  
 312 relationship between  $k_{cat,C}$  and  $k_{cat,C}/K_C$  (Savir et al., 2010). Our extended dataset does not,  
 313 however, conform to the reported power-law (Figure 5B). It should be noted that the true barrier  
 314 height to  $CO_2$  addition depends on the  $CO_2$  concentration, which could partially explain the  
 315 apparent lack of correlation. However, correlation is not improved by restricting focus to C3  
 316 plants for which data is abundant and for which measured leaf  $CO_2$  concentrations vary by only  
 317 20-30% due to variation in  $CO_2$  conductance (Caemmerer and Evans, 1991; Evans et al., 1986).

318  
 319 Absence of correlation does not necessarily imply the absence of a tradeoff. Rather, if the  
 320 Rubisco mechanism couples  $k_{cat,C}$  and  $k_{cat,C}/K_C$ , much decreased correlation over the extended  
 321 dataset ( $R < 0.4$ ) could result from several factors including bias in data collection leading to  
 322 undersampling of faster Rubiscos (e.g. those from cyanobacteria) or, alternatively, insufficient  
 323 selection pressure.

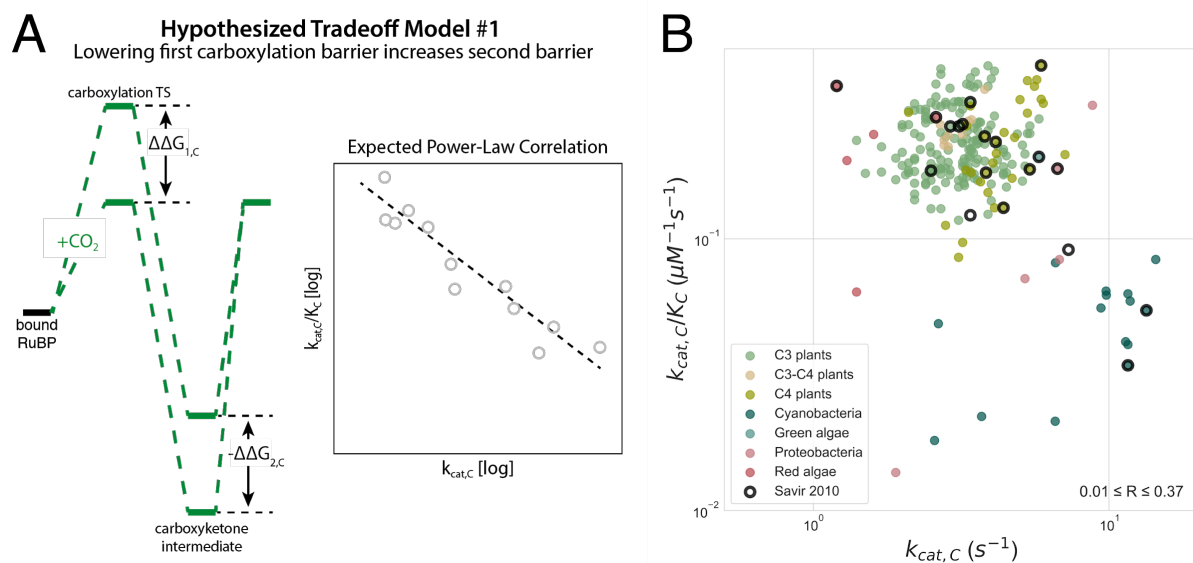

324  
 325 **Figure 5:** Negative power-law correlation between  $k_{cat,C}$  and  $k_{cat,C}/K_C$  is not supported by the extended  
 326 dataset. Under the tradeoff model in panel (A),  $CO_2$ -specific Rubiscos have low barriers to enolization and  
 327  $CO_2$  addition (first effective carboxylation barrier  $\Delta G_{1,C}$ ), but lowering the first effective barrier necessarily  
 328 increases the height of the effective barrier to subsequent carboxylation steps ( $\Delta G_{2,C}$ ). This tradeoff might  
 329 be due to coupling between the carboxylation transition state and the carboxyketone carboxylation  
 330 intermediate (Tcherkez et al., 2006), where stabilizing the TS also stabilizes the intermediate diagrammed  
 331 in panel (A) and described in Figure S2. In this case we would expect  $\Delta G_{1,C}$  and  $\Delta G_{2,C}$  to be negatively  
 332 correlated, which would manifest as negative linear correlation on a log-log plot of  $k_{cat,C}$  vs.  $k_{cat,C}/K_C$ . (B)  
 333 The extended dataset does not evidence the expected power-law correlation ( $R = 0.02$ ,  $P = 0.8$  for Form I  
 334 enzymes). Fitting the entire dataset gives  $R = 0.13$  as compared to the previously-reported  $R = -0.95$  in  
 335 (Savir et al., 2010), where two outliers were omitted. Restricting focus to particular physiologies like C3  
 336 plants does not recover the expected correlation.  
 337

338 The second mechanistic tradeoff model (Savir et al., 2010) - wherein faster CO<sub>2</sub> addition entails  
339 faster O<sub>2</sub> addition as well - is extremely well-supported by the addition of new data (Figure 6).  
340 This model was previously supported by a power-law relationship with an exponent of 0.5  
341 between  $k_{cat,C}/K_C$  and  $k_{cat,O}/K_O$  ( $k_{cat,O}/K_O \propto (k_{cat,C}/K_C)^{0.5}$ ). As  $k_{cat,C}/K_C$  is exponentially related to the  
342 first effective carboxylation barrier ( $\ln(k_{cat,C}/K_C) \propto -\Delta G_{1,C}$ ) and  $k_{cat,O}/K_O$  to the first effective  
343 oxygenation barrier ( $\ln(k_{cat,O}/K_O) \propto -\Delta G_{1,O}$ ), the power-law relationship was taken to imply that  
344 decreasing the barrier to CO<sub>2</sub> addition will also decrease the barrier to O<sub>2</sub> addition ( $0.5 \Delta G_{1,C} -$   
345  $\Delta G_{1,O} = C$ , Figure 6A).

346  
347 The extended dataset evidences clear power-law correlation between  $k_{cat,C}/K_C$  and  $k_{cat,O}/K_O$   
348 (Figure 6B). While some Form II enzymes appear to be strictly inferior to the Form I enzymes on  
349 these axes, there is a clear “front” in the  $k_{cat,C}/K_C$  vs.  $k_{cat,O}/K_O$  plot. Most measurements lie along  
350 a robust line of positive correlation in a log-log plot. Fitting the Form I enzymes gives a  
351 remarkably high-confidence ( $R = 0.93$ ,  $P < 10^{-10}$ ) power-law relationship with an exponent of  
352 roughly 1.0:  $k_{cat,C}/K_C \propto (k_{cat,O}/K_O)^{1.06}$  (Figure 6B).

353  
354  $S_{C/O}$  is defined as the ratio of  $k_{cat,C}/K_C$  to  $k_{cat,O}/K_O$ . A power law exponent of  $\approx 1$  implies a roughly  
355 constant slope relationship between  $k_{cat,C}/K_C$  and  $k_{cat,O}/K_O$ , which in turn implies that  $S_{C/O}$  is  
356 constant. However  $S_{C/O}$  is clearly not constant - it varies about tenfold between Form I and Form  
357 II Rubiscos and about threefold among Form Is (Figure 2C). Subdividing the Form I enzymes by  
358 host physiology (e.g. C3 plants, C4 plants, cyanobacteria, etc.) reveals that all groups with  
359 sufficient data display a strong and statistically-significant power-law relationship between  
360  $k_{cat,C}/K_C$  and  $k_{cat,O}/K_O$  (Figure 6C, SI (Tcherkez, 2016)). The power-law exponent differs  
361 consistently from the value of 0.5 given by (Savir et al., 2010). We now find a roughly 1:1  
362 relationship of  $\Delta G_{1,C} - \Delta G_{1,O} = C$ , meaning that a decrease in the CO<sub>2</sub> addition barrier is  
363 associated with an *equal* decrease in the barrier to O<sub>2</sub> addition. We estimate a 95% confidence  
364 interval (CI) of 0.98-1.24 for the exponent of this power law relationship for Form I enzymes, or  
365 about double the previously-reported value.

366

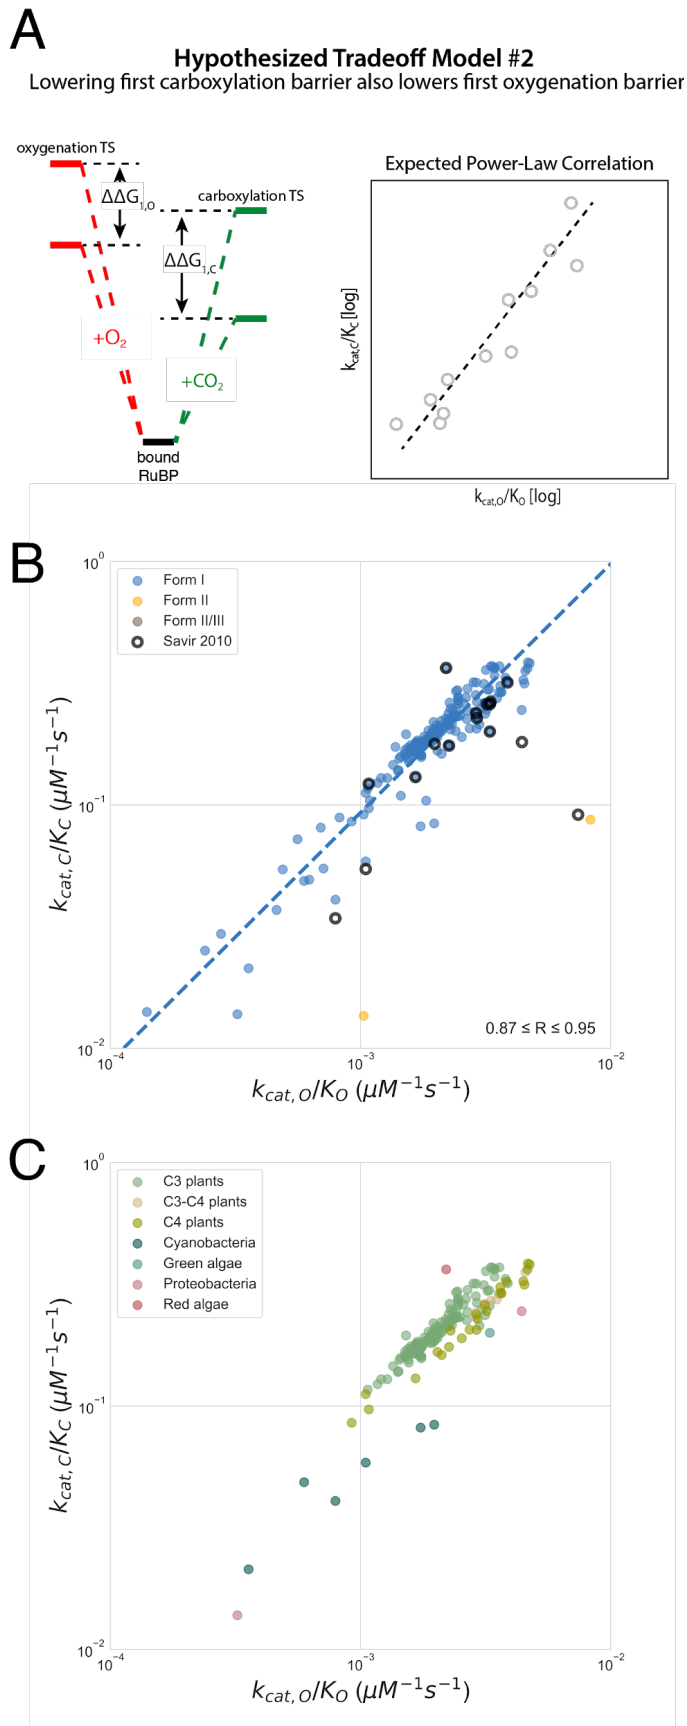

367

368

369

370

371

372

373

374

375

376

377

378

379

380

381

382

383

384

385

386

387

388

389

390

391

392

393

394

395

396

397

398

399

400

401

402

403

404

405

406

407

408

409

410

411

412

413

**Figure 6:** The second mechanistic proposal of (Savir et al., 2010) is remarkably well-supported by the extended dataset, but with a different power-law exponent. (A) In this proposal, CO<sub>2</sub> and O<sub>2</sub> addition rates are coupled, with faster CO<sub>2</sub> addition necessitating faster O<sub>2</sub> addition. This can be framed in energetic terms, where lowering the effective barrier to enolization and CO<sub>2</sub> addition ( $\Delta G_{1,C}$ ) lowers the first effective barrier to O<sub>2</sub> addition ( $\Delta G_{1,O}$ ) as well. Given this model, we would expect the barrier heights to be positively correlated, which would manifest as a positive linear correlation on a log-log plot of  $k_{cat,C}/K_C$  vs  $k_{cat,O}/K_O$ . (B) most measurements cluster along a power-law (linear in log-log) front in the  $k_{cat,C}/K_C$  vs  $k_{cat,O}/K_O$  plot (dashed blue line,  $R = 0.94$ ). While some Form I Rubiscos appear to lie beneath this front, Form II and Form II/III enzymes deviate most profoundly. A total least squares fit to the Form I enzymes produces a very strong power-law correlation ( $P < 10^{-10}$ , blue dashed line). 95% CIs for the exponent and prefactor are (0.93, 1.1) and (63, 199), respectively. The best fit power law is  $k_{on,C} \sim (k_{on,O})^{1.04}$ , but forcing  $k_{on,C} \sim (k_{on,O})^{1.0}$  gives a fit of nearly identical quality. (C) Restricting focus to particular physiologies - e.g. C3 and C4 plants, cyanobacteria - reveals that each grouping obeys a distinct power law. These power laws differ primarily in the exponential prefactor, which causes variation in the Y-intercept but not the slope on a log-log plot. 95% CIs on the power-law exponent are (0.87, 1.01) for C3 plants, (0.82, 1.01) for C4 plants, (0.38, 1.31) for C3-C4 plants and (0.38, 1.06) for cyanobacteria.

## 414 Implications for the mechanism of CO<sub>2</sub>/O<sub>2</sub> discrimination by Rubisco

415 Figure 6 shows that effective barriers to CO<sub>2</sub> and O<sub>2</sub> addition and oxygenation appear to vary in  
416 proportion with each other ( $\Delta G_{1,C} - \Delta G_{1,O} \approx \text{constant}$ ). A roughly 1:1 correlation between  
417 effective barriers to CO<sub>2</sub> and O<sub>2</sub> addition suggests that a single factor controls both. We offer a  
418 model based on the known catalytic mechanism of Rubisco that could produce a 1:1  
419 relationship between barriers. In this model, the RuBP-bound Rubisco active site fluctuates  
420 between reactive and unreactive states (Figures 7A and S10). The fraction of enzyme in the  
421 reactive state is denoted  $\phi$ . In the unreactive state neither oxygenation or carboxylation is  
422 possible. In the reactive state, either gas can react at an intrinsic rate that does not vary across  
423 Rubiscos of the same class. Since RuBP must undergo enolization in order for either  
424 carboxylation or oxygenation to occur,  $\phi$  may be determined by the degree of enolization of  
425 RuBP (SI).

426  
427 This model can be phrased quantitatively as  $\frac{k_{cat,C}}{K_C} \propto \phi \exp(-\Delta G_{1,C}^*/RT)$  and  $\frac{k_{cat,O}}{K_O} \propto \phi$   
428  $\exp(-\Delta G_{1,O}^*/RT)$  where  $\Delta G_{1,C}^*$  and  $\Delta G_{1,O}^*$  are the intrinsic reactivities of the enediolate of RuBP  
429 to CO<sub>2</sub> and O<sub>2</sub> respectively (SI, Figure S10). Under this model, we expect to observe a power-  
430 law relationship with exponent 1.0 between  $\frac{k_{cat,C}}{K_C}$  and  $\frac{k_{cat,O}}{K_O}$  (SI). Since  $S_{C/O} = (k_{cat,C}/K_C) /$   
431  $(k_{cat,O}/K_O)$ , it should be roughly constant under this model (SI). Though  $S_{C/O}$  varies the least of all  
432 measured Rubisco kinetic parameters (Figure 2C), it is not constant. However, Rubiscos  
433 isolated from hosts belonging to the same physiological grouping - e.g. C3 or C4 plants - do  
434 display a characteristic and roughly constant  $S_{C/O}$  value independent of  $k_{cat,C}/K_C$  (Figure 7B).

435  
436 This model implies that  $\phi$  can vary between related Rubiscos, perhaps by evolutionary tuning of  
437 the equilibrium constant for RuBP enolization. Since  $S_{C/O}$  is independent of the equilibrium  
438 fraction of on-enzyme RuBP enolization ( $K_E$ ), variation in  $K_E$  would affect  $k_{cat,C}/K_C$  and  $k_{cat,O}/K_O$   
439 without changing  $S_{C/O}$  (SI). Though individual groups of Rubiscos have roughly constant  $S_{C/O}$ ,  
440 specificity clearly varies between C3 plants and cyanobacteria, for example. Variation in  
441 specificity could be achieved by adjusting the difference between intrinsic reactivities  $\Delta G_{1,O}^* -$   
442  $\Delta G_{1,C}^*$  through changes to the conformation of the enediolate of RuBP. This would produce  
443 roughly constant  $S_{C/O}$  among C3 plants while permitting variation in  $S_{C/O}$  between C3 plants,  
444 cyanobacteria and proteobacterial Form I Rubiscos. A full derivation of this model and  
445 discussion of its potential implications is given in the SI.

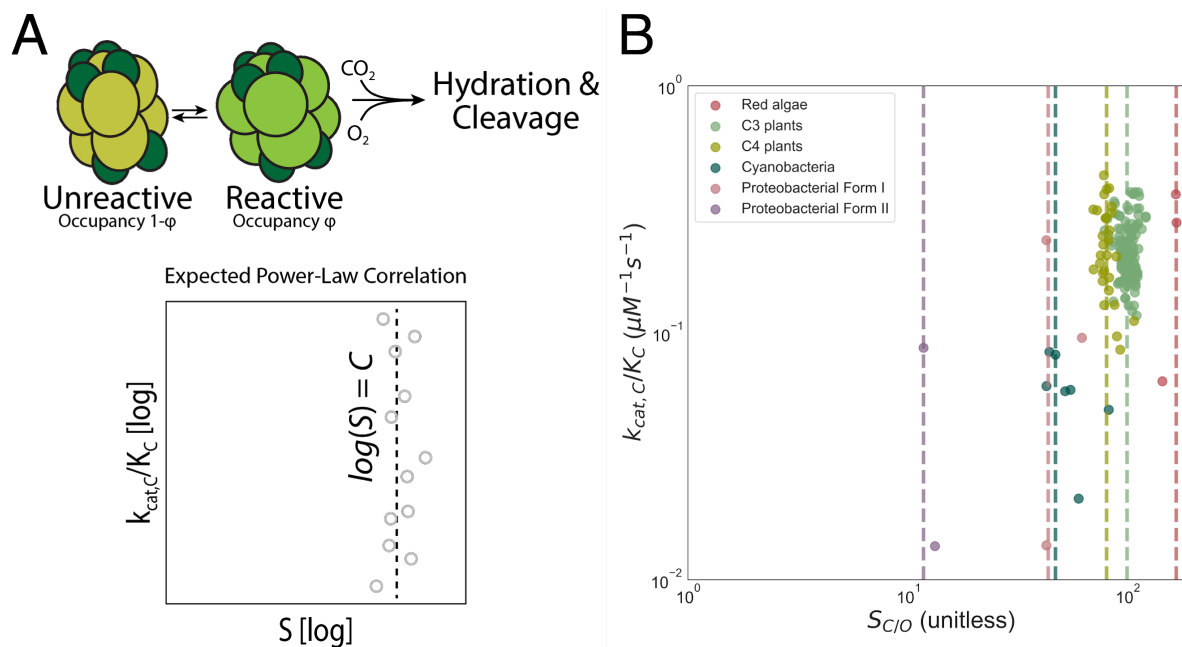

446  
 447 **Figure 7:** A power-law relationship between  $k_{\text{cat},C}/K_C$  vs  $k_{\text{cat},O}/K_O$  with an exponent of roughly 1.0 can be  
 448 explained by an active site that fluctuates between “reactive” and “unreactive” states. (A) In this model  
 449  $\text{CO}_2$  and  $\text{O}_2$  can react with the bound RuBP only if the enzyme is in the reactive state. If the difference in  
 450 intrinsic reactivities of the active site complex ( $\Delta G^*_{1,O} - \Delta G^*_{1,C}$ ) is organism-independent, we derive a  
 451 power-law relationship between  $k_{\text{cat},C}/K_C$  vs  $k_{\text{cat},O}/K_O$  that has an exponent of 1.0 (SI, Figure S8). This  
 452 model predicts that  $S_{C/O}$  is constant. However,  $S_{C/O}$  varies 3-4 fold across Form I Rubiscos. (B) Rubiscos  
 453 within the same physiological grouping - e.g. C3 or C4 plants - have roughly constant  $S_{C/O}$  independent of  
 454  $k_{\text{cat},C}/K_C$  (log scale standard deviations  $\sigma^* \leq 0.2$  in all cases). The dashed vertical line is drawn at the  
 455 median  $S_{C/O}$  value for each group, with red algal Rubiscos having the highest measured  $S_{C/O}$  values ( $S_{C/O}$   
 456  $\approx 150$ ) at 25 °C.

## 457 Discussion

458 We collected and analyzed roughly 300 literature measurements of Rubisco kinetic parameters  
 459 (Figure 2A). The collection is quite biased, with the readily-purified Rubiscos of land plants  
 460 making up  $\approx 80\%$  of the data (Figure 2B). Better sampling of Rubisco diversity including more  
 461 algal, bacterial and archaeal Rubiscos would greatly improve our understanding of the evolution  
 462 and capacity of this enzyme (Liu et al., 2017). Despite incomplete coverage, some trends are  
 463 clear. All Rubisco kinetic parameters display limited dynamic range, with standard deviations in  
 464 log-scale being less than one order-of-magnitude in all cases (Figure 2C). Rubisco appears  
 465 particularly constrained in that it displays much less  $k_{\text{cat}}$  variability than any other enzyme for  
 466 which sufficient data is available (Figure S4). For many other enzymes,  $k_{\text{cat}}$  varies over 100-fold  
 467 or more. In contrast, 97% of Rubisco  $k_{\text{cat},C}$  data are between 1 and  $10 \text{ s}^{-1}$ . The highest Rubisco  
 468  $k_{\text{cat},C}$  measured at 25 °C is  $14.4 \text{ s}^{-1}$  (*S. elongatus* PCC 7942, (Occhialini et al., 2016)), only 18-  
 469 fold greater than the lowest measured Form I  $k_{\text{cat},C}$  ( $0.83 \text{ s}^{-1}$  from the diatom *Cylindrotheca* N1,



470 (Read and Tabita, 1994)). Altogether, these data suggest that there is some limitation on the  
471 maximum carboxylation rate by Rubisco in the presence of O<sub>2</sub>.

472  
473 Other extremal Rubiscos of note include an enzyme from the thermophilic red alga *G.*  
474 *sulphuraria*, which has the lowest K<sub>C</sub> ≈ 3 μM. Red algal Rubiscos are generally the most CO<sub>2</sub>-  
475 specific (S<sub>C/O</sub> ≈ 160-200) measured at 25 °C (Uemura et al., 1997; Whitney et al., 2001). Many  
476 Rubiscos are quite slow oxygenators with more than half of measurements having  $k_{cat,O} < 1 \text{ s}^{-1}$   
477 (Figure 2A). Similarly, many Rubiscos have quite low O<sub>2</sub> affinity: the median K<sub>O</sub> is ≈ 470 μM,  
478 nearly double the Henry's law equilibrium of water with a 21% O<sub>2</sub> atmosphere at 25 °C. Rubisco  
479 from the diatom *Thalassiosira weissflogii*, for example, has a K<sub>O</sub> ≈ 2 mM (Young et al., 2016),  
480 corresponding to roughly ten times the ambient O<sub>2</sub> concentration (Sander, 2015).

481  
482 Specificity S<sub>C/O</sub> varies the least of all Rubisco parameters (Figure 2C). Nonetheless, Form I  
483 Rubiscos are much more CO<sub>2</sub>-specific than their Form II, III and II/III counterparts (Figure 7B,  
484 SI). This might be explained by the prevalence of Form II, III and II/III enzymes in bacteria and  
485 archaea that fix CO<sub>2</sub> in anaerobic conditions where oxygenation should be negligible. We note,  
486 however, that there is substantial variation among measurements of the model Form II Rubisco  
487 from *R. rubrum*. This and the general paucity of data on non-Form I Rubiscos indicates that  
488 more measurements are required to evaluate stereotyped differences within and between Form  
489 II, III and II/III Rubiscos. As such, we chose to focus here on Form I Rubiscos for which data is  
490 abundant (Figure 2).

491  
492 Overall, we observed that Rubisco appears less constrained than previously supposed. Rubisco  
493 kinetics were previously argued to vary in a one-dimensional landscape (Savir et al., 2010) and  
494 hypothesized to be “nearly perfectly optimized” (Tcherkez et al., 2006). If these arguments were  
495 true, we would expect very limited variation in Rubisco kinetics because all enzymes should  
496 attain near-optimal parameters (as diagrammed in Figure 1C). However, as shown in Figure S6,  
497 the extended dataset is not strictly one-dimensional. Consistent with this analysis, Figures 3 and  
498 S3 document an overall reduction in correlation between Form I Rubisco kinetic parameters.  
499 There are some stereotyped differences between Rubiscos from different kinds of organisms -  
500 cyanobacterial Rubiscos are among the fastest (highest  $k_{cat,C}$ ) and red algal Rubiscos are the  
501 most CO<sub>2</sub>-specific (highest S<sub>C/O</sub>). However, when we plot the assembled data in Figure 4A,  
502 there is only modest correlation between  $k_{cat,C}$  and S<sub>C/O</sub>. Similarly, Figure 4B shows relatively  
503 modest correlation between  $k_{cat,C}$  and K<sub>C</sub>. Overall weakened correlations led us to reject the  
504 notion that Rubisco kinetics vary in a one-dimensional landscape and to investigate whether  
505 previously-suggested tradeoff models truly constrain the evolution of Rubisco.

506  
507 The mechanistic tradeoff models described in Figures 5-6 are based on a simple chemical  
508 intuition: that the intrinsic difficulty of binding and discriminating between CO<sub>2</sub> and O<sub>2</sub> requires  
509 the enzyme to differentiate between carboxylation and oxygenation transition states. The  
510 requirement of TS discrimination is a direct consequence of two common assumptions that are  
511 supported by experimental evidence (Pierce et al., 1986). Briefly, it is assumed that addition of

512 either gas is irreversible and that there is no binding site for CO<sub>2</sub> or O<sub>2</sub> and, thus, no so-called  
513 “Michaelis complex” (Andrews and Lorimer, 1987; Pierce et al., 1986; Savir et al., 2010;  
514 Tcherkez et al., 2018, 2006). If CO<sub>2</sub> bound a specific site on Rubisco before reacting, K<sub>C</sub> could  
515 be modulated by mutation without substantially affecting the kinetics of subsequent reaction  
516 steps. In the unlikely case that gas addition is substantially reversible, (Cummins et al., 2018;  
517 Tcherkez et al., 2018) we would expect to find Rubiscos that evolved enhanced selectivity by  
518 energy-coupled kinetic proofreading. Energy coupling would enable amplification of selectivity  
519 determined by differential CO<sub>2</sub> and O<sub>2</sub> off-rates (Hopfield, 1974). The fact that no such Rubiscos  
520 have been found suggests that gas addition is irreversible or that the off-rates of CO<sub>2</sub> and O<sub>2</sub>  
521 are incompatible with kinetic proofreading in some other way (Savir et al., 2010; Savir and  
522 Tlusty, 2007).

523  
524 As Rubisco likely does not bind CO<sub>2</sub> directly, Tcherkez et al. 2006 hypothesize that high  
525 specificity towards CO<sub>2</sub> (i.e. large S<sub>C/O</sub>) is realized by discriminating between the first  
526 carboxylation and oxygenation transition states (i.e. between the carboxyketone and the  
527 peroxyketone, Figure S2). A late carboxylation TS would be maximally discriminable from the  
528 oxygenation TS because the developing carboxylic acid is distinguishable from the peroxy  
529 group of the oxygenation intermediate (Tcherkez et al., 2006). Since a late TS resembles the  
530 carboxyketone carboxylation intermediate, Tcherkez et al. further argue that CO<sub>2</sub>-specific  
531 Rubiscos must tightly bind the carboxyketone, which could slow the subsequent hydration and  
532 cleavage steps and restrict k<sub>cat,C</sub> (Figure S2). Though this model is motivated by the need for  
533 discrimination between CO<sub>2</sub> and O<sub>2</sub>, it implies coupling between the kinetics of carboxylation  
534 steps alone. That is: specificity requires tighter binding of the carboxylation intermediate, which  
535 slows downstream processing of that same intermediate irrespective of the oxygenation  
536 steps. The extraordinarily tight binding of the carboxyketone analog CABP to plant Rubisco  
537 provides strong support for the idea of TS discrimination. Negative correlation between k<sub>cat,C</sub> and  
538 S<sub>C/O</sub> was taken to support the idea of tighter TS binding slowing carboxylation (Tcherkez et al.,  
539 2006).

540  
541 Savir et al. 2010 articulate a related model, noting that k<sub>cat,C</sub> and k<sub>cat,C</sub>/K<sub>C</sub> are inversely correlated  
542 in their dataset (Savir et al., 2010). Since k<sub>cat,C</sub>/K<sub>C</sub> is related to the effective barrier to enolization  
543 and CO<sub>2</sub> addition and k<sub>cat,C</sub> is related to the effective barrier to hydration and cleavage (Figure  
544 1B), Savir et al. argue that lowering the effective barrier to CO<sub>2</sub> addition entails a higher barrier  
545 for the subsequent steps (i.e. a lower k<sub>cat,C</sub>, Figure 5A). In both of these descriptions, the initial  
546 steps of carboxylation are negatively coupled to the subsequent steps in a manner that  
547 produces the observed correlations. However, those correlations - between S<sub>C/O</sub> and k<sub>cat,C</sub>, K<sub>C</sub>  
548 and k<sub>cat,C</sub> and k<sub>cat,C</sub>/K<sub>C</sub> and k<sub>cat,C</sub> - are attenuated by the addition of new measurements (Figures  
549 3-4) which calls these proposals into question. Importantly, we do not argue that the chemical  
550 logic advanced by (Tcherkez et al., 2006) is incorrect, but rather that the assembled data do not  
551 support such a tradeoff being optimized over the evolution of Form I Rubiscos.

552  
553 The second tradeoff model posited by (Savir et al., 2010) is that faster CO<sub>2</sub> addition to the  
554 Rubisco-RuBP complex necessarily allows faster O<sub>2</sub> addition. This model can be motivated by  
555 the catalytic mechanism of Rubisco as well. Since Rubisco likely does not bind CO<sub>2</sub> or O<sub>2</sub>

556 directly, the concentrations of CO<sub>2</sub> and O<sub>2</sub> in the Rubisco active site should be determined by  
557 their solution concentrations alone (e.g. in the chloroplast stroma). Rubisco might limit the active  
558 site concentration of O<sub>2</sub> by closing the active site to diffusion, but this would slow CO<sub>2</sub> entry and  
559 carboxylation as well. This model was previously supported by a positive power-law correlation  
560 between the catalytic efficiencies for carboxylation and oxygenation ( $k_{\text{cat,C}}/K_C$  and  $k_{\text{cat,O}}/K_O$   
561 respectively), which can be understood as a positive coupling of the effective barriers to  
562 enolization and gas addition for both CO<sub>2</sub> and O<sub>2</sub> (Figure 6A, SI). We showed that the extended  
563 dataset strongly supports this power-law relation and suggests lowering the effective CO<sub>2</sub>  
564 addition barrier (enabling faster carboxylation) requires a *roughly equal* reduction in the effective  
565 barrier to O<sub>2</sub> addition (i.e. enabling faster oxygenation as well). Though several research groups  
566 have attempted to isolate improved Rubisco mutants, none of the mutants examined so far  
567 exceed the wild-type enzymes on these axes (Figure S11).

568  
569 A power law relation with an exponent of 1.0 can be seen as resulting from an active site that  
570 fluctuates between a reactive and unreactive state (Figure 7A). In this model, the average  
571 occupancy of the reactive state dictates the rate of CO<sub>2</sub> and O<sub>2</sub> addition and throttles the  
572 subsequent steps of carboxylation and oxygenation equally (Figure 7). This model can be  
573 mapped onto the Rubisco mechanism by noting that RuBP must be enolized before CO<sub>2</sub> or O<sub>2</sub>  
574 can react, suggesting that the occupancy of the reactive state ( $\phi$ ) is related to the degree of  
575 enolization of RuBP (SI, Figure S10). One implication of this model is that  $S_{C/O}$  is roughly  
576 constant (SI). While  $S_{C/O}$  does vary over roughly tenfold across the entire dataset and 3-4 fold  
577 across Form I enzymes (Figure 1B), Rubiscos from the same physiological groupings display  
578 roughly constant  $S_{C/O}$  values independent of  $k_{\text{cat,C}}/K_C$  (Figure 7B). More measurements of  
579 bacterial Form I, II and III Rubiscos as well as the notably high-specificity Form ID enzymes of  
580 red algae will be crucial to evaluate the generality of this observation.

581  
582 In previous work, where Rubisco kinetics were thought to vary in a one-dimensional landscape,  
583 setting  $k_{\text{cat,C}}$  determined all other kinetic parameters (Savir et al., 2010). In this setting it was  
584 argued that Rubisco kinetic parameters were wholly determined by the prevailing CO<sub>2</sub> and O<sub>2</sub>  
585 concentrations since there was a unique choice of parameters on the one-dimensional curve  
586 that maximize the net rate of carboxylation (Savir et al., 2010). Since the data is no longer  
587 clearly one-dimensional, we cannot argue that Rubisco is “perfectly optimized” to match  
588 prevailing concentrations. Moreover, the single surviving tradeoff model does not, on its own,  
589 explain why we have not found faster-carboxylating Rubiscos. The model presented in Figures  
590 6 and 7 describes a tradeoff between CO<sub>2</sub> and O<sub>2</sub> addition, but sets no upper limit on  $k_{\text{cat,C}}$ ,  
591 suggesting that selection for increased carboxylation in the absence of O<sub>2</sub> could produce  
592 Rubiscos with superlative  $k_{\text{cat,C}}$  values (i.e.  $k_{\text{cat,C}} \gg 15 \text{ s}^{-1}$ ). Such an enzyme might be used as a  
593 basis for engineering fast-and-selective Rubiscos, something that might indeed be possible if  
594  $k_{\text{cat,C}}$ ,  $K_C$  and  $S_{C/O}$  are not tightly linked to each other (Figure 4).

595  
596 The prospect of engineering an improved Rubiscos is tantalizing not only because it could  
597 plausibly increase crop yields substantially (Zhu et al., 2010), but also because the task tests  
598 our understanding of proteins and enzymes on a very basic level. It is clear from the data  
599 presented here that there is some evolutionary constraint on Rubisco catalysis. Indeed, no

600 known Rubisco has a  $k_{cat,C}$  greater than  $15 \text{ s}^{-1}$  and no measured  $S_{C/O}$  exceeds 250. Surely a  
601 superlative Rubisco would have arisen if it was mutationally accessible from existing Rubiscos.  
602 However, the large subunit of Rubisco displays extremely limited sequence variation (Kapralov  
603 and Filatov, 2007). Perhaps exploring a wider swath of sequence space via protein engineering  
604 techniques (Chin, 2014; Fowler and Fields, 2014; Silberg et al., 2004) would enable strict  
605 improvements to Rubisco kinetics? In order to better-resolve the evolutionary constraints  
606 imposed on Rubisco kinetics and evaluate the prospects of advanced Rubisco engineering, we  
607 suggest several avenues for future research.

608  
609 First, the kinetics of non-plant Rubiscos should be characterized more thoroughly. These should  
610 include the Form II, III and II/III enzymes of bacteria and archaea as well as Form I enzymes of  
611 cyanobacteria and diverse Eukaryotic autotrophs (Liu et al., 2017). Ideally these enzymes would  
612 be sampled from accumulated genomic data in a manner that maximizes sequence and  
613 phylogenetic diversity (Akiva et al., 2017) and characterized for their binding (e.g. of RuBP and  
614 CABP) and catalytic activity (measuring  $k_{cat,C}$ ,  $K_C$ ,  $k_{cat,O}$ ,  $K_O$  and  $S_{C/O}$ ) as a function of  
615 temperature and pH (Orr et al., 2016; Sharwood et al., 2016). These data would likely resolve  
616 whether Rubisco isoforms display characteristic differences in catalytic potential. It is possible,  
617 for example, that Form II, III or II/III enzymes are subject to different constraints than Form I  
618 Rubiscos and might serve as useful chassis for bioengineering.

619  
620 Furthermore, it is important to revisit the classic experiments undergirding our understanding of  
621 the Rubisco catalytic mechanism, especially those supporting the central assumptions that (a)  
622 there is no Michaelis complex for  $\text{CO}_2$  or  $\text{O}_2$  and (b) that gas addition is irreversible (Cummins et  
623 al., 2018; Pierce et al., 1986; Tcherkez et al., 2018). As mentioned above, these assumptions  
624 imply substantial limitation on  $\text{CO}_2$  specificity by, for example, disallowing a kinetic proofreading  
625 based mechanism for the amplification of specificity. If we were to find Rubiscos for which these  
626 assumptions are relaxed, they might be used as a basis for future engineering of a fast-and-  
627 selective carboxylase. On the other hand, it may be the case that all Rubiscos share these  
628 same limitations and are constrained by the same tradeoffs. Since tradeoffs in Rubisco catalysis  
629 are likely described by couplings between transition state barriers (e.g. as in Figure 6) it would  
630 be very useful to measure TS barrier heights for many variants. One avenue for further  
631 investigation would be measurement of carbon and oxygen kinetic isotope effects (KIEs) for a  
632 wide variety of Rubiscos. Kinetic isotope effects report indirectly on TS barrier heights (Hayes,  
633 2001; McNevin et al., 2007) and KIEs could plausibly be measured in relatively high throughput  
634 via mass spectrometry. Investigating the relationship between kinetic isotope effects and kinetic  
635 parameters will hopefully refine our understanding of the Rubisco mechanism and help clarify  
636 whether different families of Rubisco enzymes are subject to the same constraints (Tcherkez et  
637 al., 2006).

638  
639 There remains some disagreement about the precise ordering of Rubisco carboxylation steps  
640 (Andersson, 2008; Cleland et al., 1998; Tcherkez et al., 2006) and the mechanism of  
641 oxygenation is not well understood (Tcherkez, 2016). Chemical reasoning about the  
642 mechanisms of Rubisco carboxylation and oxygenation would benefit from progress in structural  
643 biology - intermediates and transition state analogs should be used to capture the active site at

644 various points along the reaction trajectory (Andersson and Backlund, 2008; Cleland et al.,  
645 1998; Schneider et al., 1992; Stec, 2012; Tcherkez, 2016). If experiments and structural  
646 analyses confirm that the above assumptions hold for all Rubiscos, it would greatly limit our  
647 capacity to engineer Rubisco and strongly suggest that alternative strategies for improving  
648 carbon fixation should be pursued (Bar-Even, 2017; McGrath and Long, 2014; South et al.,  
649 2019). If, however, these assumptions are invalidated, many enzyme engineering strategies  
650 would be viable. Such data and analyses will be instrumental in guiding the engineering of  
651 carbon fixation for the next decade.

## 652 Methods

653 **Data collection and curation.** We reviewed the literature to find Rubisco kinetic data measured  
654 at 25 °C and near pH 8. Ultimately 61 primary literature studies were included, yielding 334  $S_{C/O}$ ,  
655 282  $k_{cat,C}$ , 316  $K_C$ , and 254  $K_O$  values for Rubiscos from 304 distinct organisms (Datasets S1 and  
656 S2). We also recorded 52 measurements of the Michaelis constant for RuBP ( $K_{RuBP}$ ).  
657 Experimental error was recorded for all of these values (when reported) along with the pH,  
658 temperature and other metadata. Data was filtered as described in SI.  $k_{cat,O}$  is usually not  
659 measured directly, but is rather inferred as  $k_{cat,O} = (k_{cat,C}/K_C) / (S_{C/O}/K_O)$ . When an uncertainty is  
660 reported, we assumed that the underlying experimental noise is normally distributed and used  
661  $10^4$ -fold bootstrapping to estimate 198  $k_{cat,O}$  values and 95% confidence intervals thereof. We  
662 used an identical procedure to estimate  $k_{cat,C}/K_C$  and  $k_{cat,O}/K_O$  and confidence intervals thereof  
663 (SI). Altogether, we were able to calculate 274  $k_{cat,C}/K_C$  and 199  $k_{cat,O}/K_O$  values. Datasets S1  
664 and S2 provide all source and inferred data respectively.

665  
666 **Fitting power laws.** As certain model Rubiscos are measured frequently (e.g. we found 12  
667 independent measurements of the Rubisco from spinach), multiple measurements are available  
668 for some Rubiscos. In these cases we used the median measured value in correlation and  
669 regression analyses to avoid bias. In contrast to textbook examples with one independent and  
670 one dependent variable, there is experimental error associated with both variables in all scatter  
671 plots shown here. As such we used total least squares linear regression in log scale to fit  
672 relationships between Rubisco parameters. Because  $R^2$  values of total least squares fits do not  
673 convey the explained fraction of Y axis variance, they are challenging to interpret. We instead  
674 report the degree of correlation as Pearson R values. Bootstrapping was used to determine  
675 95% confidence intervals for the Pearson correlation coefficient, power-law exponents and  
676 prefactors (i.e. the slopes and intercepts of linear fits in log-log scale). In each iteration of the  
677 bootstrap, data were subsampled to 90% with replacement. Total least squares regression was  
678 applied to each subsample to determine a point estimate of R, the power-law exponent and  
679 prefactor. This procedure was repeated  $10^4$  times to determine a 95% confidence intervals on  
680 the above parameters. Python source code is available at [github.com/flamholz/rubisco](https://github.com/flamholz/rubisco).

## 681 Acknowledgements

682 We would like to thank Uri Alon, Kapil Amarnath, Doug Banda, Arren Bar-Even, Cissi Blikstad,  
683 Jack Desmarais, Woodward Fischer, Vahe Galstyan, Laura Helen Gunn, Itai Halevy, Robert

684 Nichols, Elad Noor, Jeremy Roop, Yonatan Savir, Patrick Shih, Daniel Stolper, Dan Tawfik,  
685 Guillaume Tcherkez, Tsvi Tlusty and Renee Wang for helpful conversations and comments on  
686 the manuscript. This research was supported by the US Department of Energy Grant (DE-  
687 SC00016240); the European Research Council (project NOVCARBFIX 646827); the Israel  
688 Science Foundation (grant No. 740/16); the ISF-NRF Singapore joint research program (grant  
689 No. 7662712); Beck-Canadian Center for Alternative Energy Research; Dana and Yossie  
690 Hollander; Ullmann Family Foundation; Helmsley Charitable Foundation; The Larson Charitable  
691 Foundation; Wolfson Family Charitable Trust; Charles Rothschild; Selmo Nussenbaum. R.M. is  
692 the Charles and Louise Gartner professional chair. A.I.F. was supported by a National Science  
693 Foundation Graduate Research Fellowship. Y.M.B. is an Azrieli fellow.

## 694 Competing Interests

695 The authors declare no competing interests.

## 696 References

- 697 Akiva E, Copp JN, Tokuriki N, Babbitt PC. 2017. Evolutionary and molecular foundations of  
698 multiple contemporary functions of the nitroreductase superfamily. *Proc Natl Acad Sci U S*  
699 *A* **114**:E9549–E9558.
- 700 Andersson I. 2008. Catalysis and regulation in Rubisco. *J Exp Bot* **59**:1555–1568.
- 701 Andersson I, Backlund A. 2008. Structure and function of Rubisco. *Plant Physiol Biochem*  
702 **46**:275–291.
- 703 Andrews TJ, Lorimer GH. 1987. 3 - Rubisco: Structure, Mechanisms, and Prospects for  
704 Improvement In: Hatch, Boardman NK, editors. Photosynthesis. Academic Press. pp. 131–  
705 218.
- 706 Bainbridge G, Madgwick P, Parmar S, Mitchell R, Paul M, Pitts J, Keys AJ, Parry MAJ. 1995.  
707 Engineering Rubisco to change its catalytic properties. *J Exp Bot* **46**:1269–1276.
- 708 Bar-Even A. 2017. Daring metabolic designs for enhanced plant carbon fixation. *Plant Sci*.  
709 doi:10.1016/j.plantsci.2017.12.007
- 710 Bar-Even A, Noor E, Savir Y, Liebermeister W, Davidi D, Tawfik DS, Milo R. 2011. The  
711 Moderately Efficient Enzyme: Evolutionary and Physicochemical Trends Shaping Enzyme  
712 Parameters. *Biochemistry*. doi:10.1021/bi2002289
- 713 Bar-On YM, Phillips R, Milo R. 2018. The biomass distribution on Earth. *Proc Natl Acad Sci U S*  
714 *A*. doi:10.1073/pnas.1711842115
- 715 Bathellier C, Tcherkez G, Lorimer GH, Farquhar GD. 2018. Rubisco is not really so bad. *Plant*  
716 *Cell Environ* **41**:705–716.
- 717 Bauwe H, Hagemann M, Fernie AR. 2010. Photorespiration: players, partners and origin.  
718 *Trends Plant Sci* **15**:330–336.
- 719 Busch FA, Sage RF, Farquhar GD. 2017. Plants increase CO<sub>2</sub> uptake by assimilating nitrogen  
720 via the photorespiratory pathway. *Nat Plants*. doi:10.1038/s41477-017-0065-x
- 721 Caemmerer SV, Evans JR. 1991. Determination of the Average Partial Pressure of CO<sub>2</sub> in  
722 Chloroplasts From Leaves of Several C<sub>3</sub> Plants. *Funct Plant Biol* **18**:287–305.
- 723 Chin JW. 2014. Expanding and reprogramming the genetic code of cells and animals. *Annu Rev*  
724 *Biochem* **83**:379–408.
- 725 Cleland WW, Andrews TJ, Gutteridge S, Hartman FC, Lorimer GH. 1998. Mechanism of  
726 Rubisco: The Carbamate as General Base. *Chem Rev* **98**:549–562.
- 727 Cummins PL, Kannappan B, Gready JE. 2018. Directions for Optimization of Photosynthetic

- 728 Carbon Fixation: RuBisCO's Efficiency May Not Be So Constrained After All. *Front Plant*  
729 *Sci* **9**:183.
- 730 Evans JR, Sharkey TD, Berry JA, Farquhar GD. 1986. Carbon Isotope Discrimination measured  
731 Concurrently with Gas Exchange to Investigate CO<sub>2</sub> Diffusion in Leaves of Higher Plants.  
732 *Funct Plant Biol* **13**:281–292.
- 733 Flamholz A, Noor E, Bar-Even A, Milo R. 2012. eQuilibrator—the biochemical thermodynamics  
734 calculator. *Nucleic Acids Res* **40**:D770–5.
- 735 Fowler DM, Fields S. 2014. Deep mutational scanning: a new style of protein science. *Nat*  
736 *Methods* **11**:801–807.
- 737 Galmés J, Kapralov MV, Andralojc PJ, Conesa MÀ, Keys AJ, Parry MAJ, Flexas J. 2014.  
738 Expanding knowledge of the Rubisco kinetics variability in plant species: environmental and  
739 evolutionary trends. *Plant Cell Environ* **37**:1989–2001.
- 740 Hayes JM. 2001. Fractionation of Carbon and Hydrogen Isotopes in Biosynthetic Processes.  
741 *Rev Mineral Geochem* **43**:225–277.
- 742 Hopfield JJ. 1974. Kinetic proofreading: a new mechanism for reducing errors in biosynthetic  
743 processes requiring high specificity. *Proc Natl Acad Sci U S A* **71**:4135–4139.
- 744 Jaffe AL, Castelle CJ, Dupont CL, Banfield JF. 2018. Lateral gene transfer shapes the  
745 distribution of RuBisCO among Candidate Phyla Radiation bacteria and DPANN archaea.  
746 *Mol Biol Evol*. doi:10.1093/molbev/msy234
- 747 Jordan DB, Ogren WL. 1981. Species variation in the specificity of ribulose biphosphate  
748 carboxylase/oxygenase. *Nature* **291**:513.
- 749 Kapralov MV, Filatov DA. 2007. Widespread positive selection in the photosynthetic Rubisco  
750 enzyme. *BMC Evol Biol* **7**:73.
- 751 Liu D, Ramya RCS, Mueller-Cajar O. 2017. Surveying the expanding prokaryotic Rubisco  
752 multiverse. *FEMS Microbiol Lett* **364**. doi:10.1093/femsle/fnx156
- 753 Mangan NM, Flamholz A, Hood RD, Milo R, Savage DF. 2016. pH determines the energetic  
754 efficiency of the cyanobacterial CO<sub>2</sub> concentrating mechanism. *Proc Natl Acad Sci U S A*  
755 **113**:E5354–62.
- 756 McGrath JM, Long SP. 2014. Can the cyanobacterial carbon-concentrating mechanism increase  
757 photosynthesis in crop species? A theoretical analysis. *Plant Physiol* **164**:2247–2261.
- 758 McNevin DB, Badger MR, Whitney SM, von Caemmerer S, Tcherkez GGB, Farquhar GD. 2007.  
759 Differences in Carbon Isotope Discrimination of Three Variants of D-Ribulose-1,5-  
760 bisphosphate Carboxylase/Oxygenase Reflect Differences in Their Catalytic Mechanisms. *J*  
761 *Biol Chem* **282**:36068–36076.
- 762 Occhialini A, Lin MT, Andralojc PJ, Hanson MR, Parry MAJ. 2016. Transgenic tobacco plants  
763 with improved cyanobacterial Rubisco expression but no extra assembly factors grow at  
764 near wild-type rates if provided with elevated CO<sub>2</sub>. *Plant J* **85**:148–160.
- 765 Orr DJ, Alcântara A, Kapralov MV, Andralojc PJ, Carmo-Silva E, Parry MAJ. 2016. Surveying  
766 Rubisco Diversity and Temperature Response to Improve Crop Photosynthetic Efficiency.  
767 *Plant Physiol* **172**:707–717.
- 768 Parry MAJ, Keys AJ, Gutteridge S. 1989. Variation in the Specificity Factor of C<sub>3</sub> Higher Plant  
769 Rubiscos Determined by the Total Consumption of Ribulose-P<sub>2</sub>. *J Exp Bot* **40**:317–320.
- 770 Pierce J, Lorimer GH, Reddy GS. 1986. Kinetic mechanism of ribulosebisphosphate  
771 carboxylase: evidence for an ordered, sequential reaction. *Biochemistry* **25**:1636–1644.
- 772 Raven JA. 2013. Rubisco: still the most abundant protein of Earth? *New Phytol* **198**:1–3.
- 773 Raven JA, Beardall J, Sánchez-Baracaldo P. 2017. The possible evolution, and future, of CO<sub>2</sub>-  
774 concentrating mechanisms. *J Exp Bot*. doi:10.1093/jxb/erx110
- 775 Read BA, Tabita FR. 1994. High substrate specificity factor ribulose bisphosphate  
776 carboxylase/oxygenase from eukaryotic marine algae and properties of recombinant  
777 cyanobacterial RubiSCO containing “algal” residue modifications. *Arch Biochem Biophys*  
778 **312**:210–218.

- 779 Reinhold L, Kosloff R, Kaplan A. 1991. A model for inorganic carbon fluxes and photosynthesis  
780 in cyanobacterial carboxysomes. *Can J Bot* **69**:984–988.
- 781 Sander R. 2015. Compilation of Henry's law constants (version 4.0) for water as solvent. *Atmos*  
782 *Chem Phys* **15**:4399–4981.
- 783 Savir Y, Noor E, Milo R, Tlusty T. 2010. Cross-species analysis traces adaptation of Rubisco  
784 toward optimality in a low-dimensional landscape. *Proc Natl Acad Sci U S A* **107**:3475–  
785 3480.
- 786 Savir Y, Tlusty T. 2007. Conformational proofreading: the impact of conformational changes on  
787 the specificity of molecular recognition. *PLoS One* **2**:e468.
- 788 Schneider G, Lindqvist Y, Brändén CI. 1992. RUBISCO: structure and mechanism. *Annu Rev*  
789 *Biophys Biomol Struct* **21**:119–143.
- 790 Sharwood RE, Ghannoum O, Kapralov MV, Gunn LH, Whitney SM. 2016. Temperature  
791 responses of Rubisco from Paniceae grasses provide opportunities for improving C3  
792 photosynthesis. *Nat Plants* **2**:16186.
- 793 Shih PM, Occhialini A, Cameron JC, Andralojc PJ, Parry MAJ, Kerfeld CA. 2016. Biochemical  
794 characterization of predicted Precambrian RuBisCO. *Nat Commun* **7**:10382.
- 795 Shoal O, Sheftel H, Shinar G, Hart Y, Ramote O, Mayo A, Dekel E, Kavanagh K, Alon U. 2012.  
796 Evolutionary trade-offs, Pareto optimality, and the geometry of phenotype space. *Science*  
797 **336**:1157–1160.
- 798 Silberg JJ, Endelman JB, Arnold FH. 2004. SCHEMA-guided protein recombination. *Methods*  
799 *Enzymol* **388**:35–42.
- 800 South PF, Cavanagh AP, Liu HW, Ort DR. 2019. Synthetic glycolate metabolism pathways  
801 stimulate crop growth and productivity in the field. *Science* **363**:eaat9077.
- 802 Spreitzer RJ, Salvucci ME. 2002. Rubisco: structure, regulatory interactions, and possibilities for  
803 a better enzyme. *Annu Rev Plant Biol* **53**:449–475.
- 804 Stec B. 2012. Structural mechanism of RuBisCO activation by carbamylation of the active site  
805 lysine. *Proceedings of the National Academy of Sciences* **109**.  
806 doi:10.1073/pnas.1210754109
- 807 Tcherkez G. 2016. The mechanism of Rubisco-catalysed oxygenation. *Plant Cell Environ*  
808 **39**:983–997.
- 809 Tcherkez GG, Bathellier C, Farquhar GD, Lorimer GH. 2018. Commentary: Directions for  
810 Optimization of Photosynthetic Carbon Fixation: RuBisCO's Efficiency May Not Be So  
811 Constrained After All. *Front Plant Sci* **9**:929.
- 812 Tcherkez GGB, Farquhar GD, Andrews TJ. 2006. Despite slow catalysis and confused  
813 substrate specificity, all ribulose biphosphate carboxylases may be nearly perfectly  
814 optimized. *Proc Natl Acad Sci U S A*. doi:10.1073/pnas.0600605103
- 815 Uemura K, Anwaruzzaman, Miyachi S, Yokota A. 1997. Ribulose-1,5-bisphosphate  
816 carboxylase/oxygenase from thermophilic red algae with a strong specificity for CO2  
817 fixation. *Biochem Biophys Res Commun* **233**:568–571.
- 818 Whitney SM, Baldet P, Hudson GS, Andrews TJ. 2001. Form I Rubiscos from non-green algae  
819 are expressed abundantly but not assembled in tobacco chloroplasts. *Plant J* **26**:535–547.
- 820 Wildman SG. 2002. Along the trail from Fraction I protein to Rubisco (ribulose biphosphate  
821 carboxylase-oxygenase). *Photosynth Res* **73**:243–250.
- 822 Young JN, Heures AM, Sharwood RE, Rickaby REM, Morel FMM, Whitney SM. 2016. Large  
823 variation in the Rubisco kinetics of diatoms reveals diversity among their carbon-  
824 concentrating mechanisms. *J Exp Bot* **67**:3445–3456.
- 825 Zhu X-G, Long SP, Ort DR. 2010. Improving photosynthetic efficiency for greater yield. *Annu*  
826 *Rev Plant Biol* **61**:235–261.

827
